# Supplementary material for: Embryoid Body Cells from Human Embryonic Stem Cells Overexpressing Dopaminergic Transcription Factors Survive and Initiate Neurogenesis via Neural Rosettes in the Substantia Nigra
Source: MDPI journal article supplement (doi:10.3390/brainsci13020329), 2023-02-14
Supplement: s1 [file s1]

**Table S3.** Dcx distribution *per* neural rosettes at 7 and 15 dpt.

|        | 7 dpt                           |                        | 15 dpt                          |                        |
|--------|---------------------------------|------------------------|---------------------------------|------------------------|
|        | % DCX in apical<br>zone (lumen) | % DCX in basal<br>zone | % DCX in apical zone<br>(lumen) | % DCX in basal<br>zone |
| Sham   | 45.45 ± 6.43                    | 0.00 ± 0.00            | 9.30 ± 10.40                    | 11.63 ± 11.03          |
| 6-OHDA | 47.37 ± 39.74                   | 2.63 ± 3.72            | 21.67 ± 20.82                   | 25.00 ± 11.79          |

The percentage was obtained from the quantification of the Dcx distribution by individual neural rosettes in at least two slices, in three different areas, from 2 rat brains. dpt: days post-transplantation.
