# Supplementary material for: Embryoid Body Cells from Human Embryonic Stem Cells Overexpressing Dopaminergic Transcription Factors Survive and Initiate Neurogenesis via Neural Rosettes in the Substantia Nigra
Source: MDPI journal article supplement (doi:10.3390/brainsci13020329), 2023-02-14
Supplement: s1 [file s1]

**Table S1.** Number of rats grafted and percentage of rats with surviving transplants.

| Condition | Dpt | hESC       | hiPSC      | hESC-LFO     |                             |
|-----------|-----|------------|------------|--------------|-----------------------------|
|           |     | Survival % | Survival % | Survival %   | Presence of neural rosettes |
| Untreated | 7   | 0% (n=3)   | 0% (n=5)   | 60% (n=5)    | (+)                         |
|           | 15  | 0% (n=3)   | 0% (n=5)   | 60% (n=5)    | (+)                         |
|           | 30  | 0% (n=3)   | ND         | 100% (n=2)   | (-)                         |
| Sham      | 7   | 0% (n=3)   | ND         | 75 % (n=8)   | (+)                         |
|           | 15  | 0% (n=5)   | ND         | 87.5% (n=8)  | (+)                         |
|           | 30  | 0% (n=3)   | ND         | 0% (n=5)     | (-)                         |
| 6-OHDA    | 7   | 0% (n=8)   | 0% (n=8)   | 87.5% (n=8)  | (+)                         |
|           | 15  | 0% (n=8)   | 0% (n=8)   | 75% (n=8)    | (+)                         |
|           | 30  | 0% (n=5)   | ND         | 9.09% (n=11) | (-)                         |

dpt: days post-transplantation; ND: not done; Survival % (percentage rats with graft survival of total transplanted rats), n=total number of transplanted rats.
