# Supplementary material for: Embryoid Body Cells from Human Embryonic Stem Cells Overexpressing Dopaminergic Transcription Factors Survive and Initiate Neurogenesis via Neural Rosettes in the Substantia Nigra
Source: MDPI journal article supplement (doi:10.3390/brainsci13020329), 2023-02-14
Supplement: s1 [file s1]

**Table S2.** List of antibodies used in this study

| <b>Antibody</b>            | <b>Type</b> | <b>Dilution</b> | <b>Company</b> |
|----------------------------|-------------|-----------------|----------------|
| Zonula occludens 1 (ZO-1)  | Primary     | 1:100           | BD             |
| STEM121                    | Primary     | 1:1000          | Millipore      |
| Lmx1a                      | Primary     | 1:1000          | Millipore      |
| Otx2                       | Primary     | 1:1000          | Thermo Fisher  |
| Doublecortin (Dcx)         | Primary     | 1:1000          | Millipore      |
| Tyrosine hydroxylase (Th)  | Primary     | 1:500           | Thermo Fisher  |
| Alexa Fluor 458 Anti-Mouse | Secondary   | 1:1000          | Millipore      |
| Alexa Fluor 645 Anti-Goat  | Secondary   | 1:400           | Millipore      |
